# Supplementary material
Source: PubMed Central journal article supplement (PMC3683773)
Supplement: 1304046110_pnas.201304046SI.pdf [file 1304046110_pnas.201304046SI.pdf]

# Supporting Information

Goh et al. 10.1073/pnas.1304046110

## SI Materials and Methods

**Immunofluorescence.** For immunofluorescence studies, liver tissue was fixed in 4% (vol/vol) paraformaldehyde for 2 h, transferred to a 30% sucrose solution (vol/vol) overnight at 4°C, and subsequently frozen in optimal cutting temperature (OCT) medium. To stain for GFP, frozen tissue sections (5  $\mu$ m) were fixed in 4% paraformaldehyde (vol/vol), permeabilized, and then stained with anti-GFP antibody (1:1,000, Novus Biologicals). A tyramide

signal amplification kit was used to amplify the GFP signal (Perkin-Elmer).

**ALT and Necrotic Area Quantification.** Serum alanine aminotransferase (ALT) levels were measured using an ALT-SL kit (Genzyme Diagnostics). To quantify necrotic cell area, liver sections were stained with H&E, and 10 random fields from each animal were analyzed, using ImageJ software.

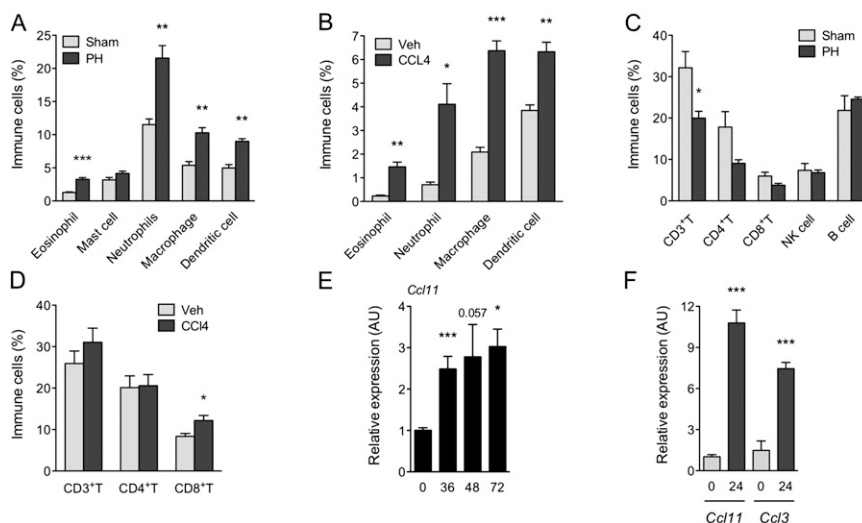

**Fig. S1.** Immune cell repertoire of regenerating livers. (A and B) Liver regeneration after partial hepatectomy (PH) or toxin-induced injury [carbon tetrachloride (CCl<sub>4</sub>)] is associated with recruitment of innate immune cells. Infiltration by innate immune cells was analyzed 2 d after PH or CCl<sub>4</sub>-mediated injury ( $n = 4$  mice per group). (C and D) The percentages of adaptive immune cells were analyzed 2 d after PH and CCl<sub>4</sub>-mediated injury in wild-type (WT) BALB/c mice ( $n = 4$  mice per group). (E and F) Expression of eotaxin-1 (*Ccl11*) after PH and/or CCl<sub>4</sub>-mediated injury ( $n = 3-8$  mice per group and time). \* $P < 0.05$ , as determined by Student  $t$  test. All data are presented as mean  $\pm$  SEM.

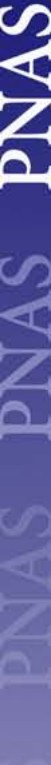





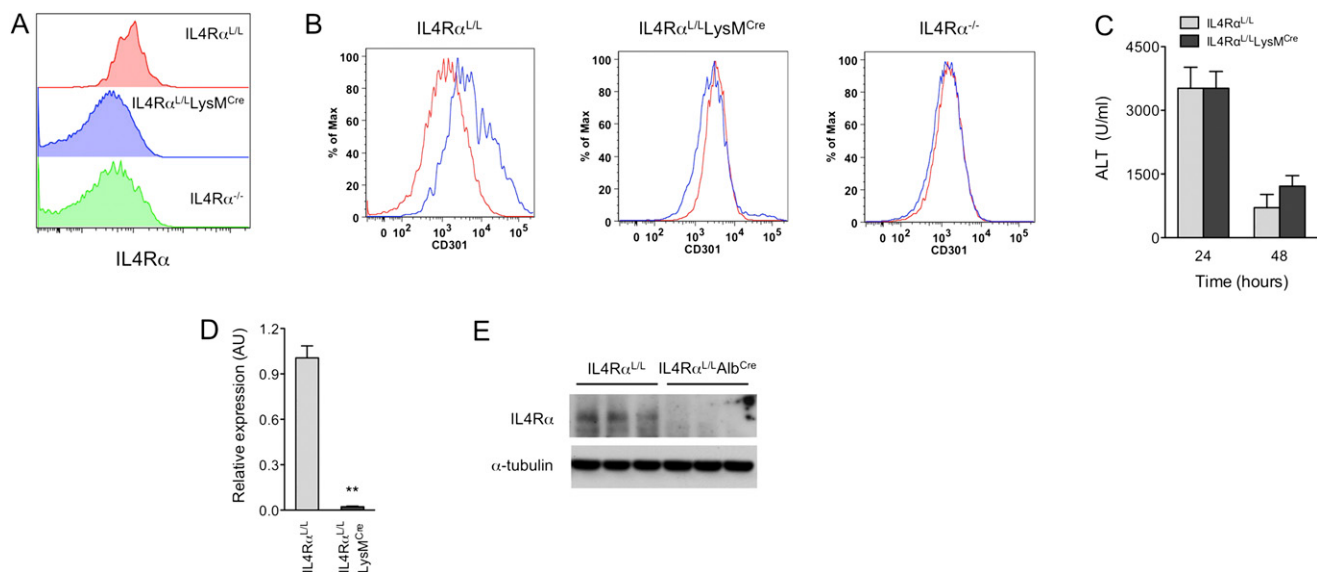

**Fig. S8.** Deletion of IL-4Rα in myeloid cells and hepatocytes. (A) Expression of IL-4Rα on peritoneal macrophages of IL4Rα<sup>L/L</sup>, IL4Rα<sup>L/L</sup>LysM<sup>Cre</sup> (IL4Rα floxed allele crossed with Cre recombinase driven by Lysozyme 2 promoter), and IL4Rα<sup>-/-</sup> mice. (B) Expression of alternative activation marker CD301 in peritoneal macrophages. IL4Rα<sup>L/L</sup>, IL4Rα<sup>L/L</sup>LysM<sup>Cre</sup>, and IL4Rα<sup>-/-</sup> mice that were given a single injection of IL-4 and CD301 expression were analyzed by flow cytometry on peritoneal macrophages 48 h later. (C) Serum levels of ALT in IL4Rα<sup>L/L</sup> and IL4Rα<sup>L/L</sup>LysM<sup>Cre</sup> mice at indicated times after injection of CCl<sub>4</sub> (n = 4–5 per genotype and time). (D and E) Expression of IL-4Rα in primary hepatocytes isolated from IL4Rα<sup>L/L</sup> and IL4Rα<sup>L/L</sup>Alb<sup>Cre</sup> (IL4Rα floxed allele crossed with Cre recombinase driven by Albumin promoter) mice; quantitative RT-PCR analysis of IL-4Rα mRNA (D) and immunoblot analysis of IL-4Rα protein (E). \*P < 0.05, \*\*P < 0.01.

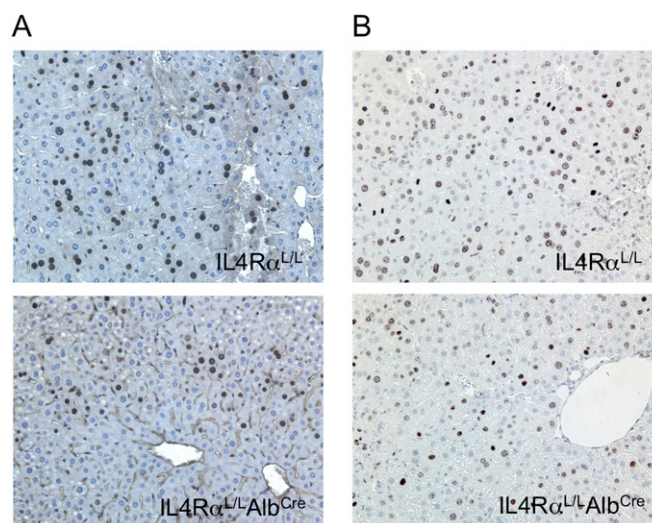

**Fig. S9.** IL-4Rα signaling in hepatocytes is required for liver regeneration after injury. (A) Representative liver sections from IL4Rα<sup>L/L</sup> and IL4Rα<sup>L/L</sup>Alb<sup>Cre</sup> mice were stained for BrdU 36 h after partial hepatectomy. (B) Representative liver sections from IL4Rα<sup>L/L</sup> and IL4Rα<sup>L/L</sup>Alb<sup>Cre</sup> mice were stained for Ki67 2 d after injury with CCl<sub>4</sub>.

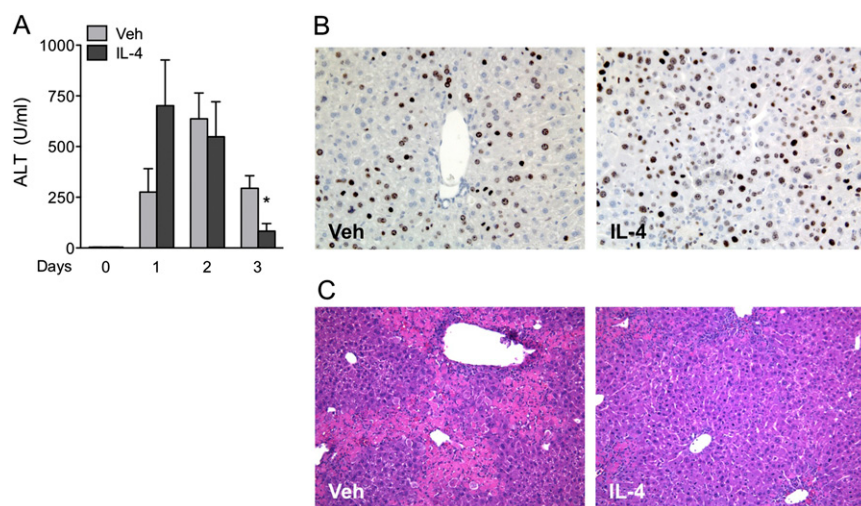

**Fig. 510.** Treatment with IL-4 protects mice from CCl<sub>4</sub>-induced liver damage. (A) Serum levels of ALT in vehicle (Veh) and IL-4-treated mice after administration of CCl<sub>4</sub>. (B) Representative liver sections from Veh and IL-4 mice were stained for K67 3 d after administration of CCl<sub>4</sub>. (C) Representative H&E staining of liver sections from Veh and IL-4-treated mice 3 d after administration of CCl<sub>4</sub> ( $n = 4-5$  mice per genotype). \* $P < 0.05$ , as determined by Student  $t$  test. All data are presented as mean  $\pm$  SEM.

**Table S1. GO terms associated with genes that were differentially expressed in WT and IL-4/IL-13<sup>-/-</sup> mice**

| GO term                                                                     | Gene no. | Genes                                                                                                                                      | P value     |
|-----------------------------------------------------------------------------|----------|--------------------------------------------------------------------------------------------------------------------------------------------|-------------|
| GO:0022403~cell cycle phase                                                 | 16       | DBF4, TPX2, KIF18A, CDC23, NUSAP1, ANLN, CDC20, RAD51, C79407, NCAPD2, CCNB1, PLK1, SPAG5, F630043A04RIK, CDCA2, H2AFX                     | 1.53E-07    |
| GO:0000279~M phase                                                          | 15       | TPX2, KIF18A, CDC23, NUSAP1, ANLN, CDC20, RAD51, C79407, NCAPD2, CCNB1, PLK1, SPAG5, F630043A04RIK, CDCA2, H2AFX                           | 1.57E-07    |
| GO:0022402~cell cycle process                                               | 17       | DBF4, TPX2, KIF18A, CDC23, NUSAP1, ANLN, CDC20, RAD51, C79407, NCAPD2, CCNB1, PLK1, SPAG5, GSK3B, F630043A04RIK, CDCA2, H2AFX              | 2.79E-07    |
| GO:0000280~nuclear division                                                 | 12       | CCNB1, PLK1, SPAG5, F630043A04RIK, KIF18A, CDCA2, CDC23, NUSAP1, CDC20, ANLN, NCAPD2, C79407                                               | 7.79E-07    |
| GO:0007067~mitosis                                                          | 12       | CCNB1, PLK1, SPAG5, F630043A04RIK, KIF18A, CDCA2, CDC23, NUSAP1, CDC20, ANLN, NCAPD2, C79407                                               | 7.79E-07    |
| GO:0000087~M phase of mitotic cell cycle                                    | 12       | CCNB1, PLK1, SPAG5, F630043A04RIK, KIF18A, CDCA2, CDC23, NUSAP1, CDC20, ANLN, NCAPD2, C79407                                               | 9.58E-07    |
| GO:0048285~organelle fission                                                | 12       | CCNB1, PLK1, SPAG5, F630043A04RIK, KIF18A, CDCA2, CDC23, NUSAP1, CDC20, ANLN, NCAPD2, C79407                                               | 1.11E-06    |
| GO:0000278~mitotic cell cycle                                               | 13       | DBF4, KIF18A, CDC23, NUSAP1, ANLN, CDC20, C79407, NCAPD2, CCNB1, SPAG5, PLK1, F630043A04RIK, CDCA2                                         | 1.36E-06    |
| GO:0007049~cell cycle                                                       | 19       | PRC1, DBF4, KIF18A, TPX2, CDC23, NUSAP1, ANLN, CDC20, CHEK2, RAD51, C79407, NCAPD2, CCNB1, PLK1, SPAG5, GSK3B, F630043A04RIK, CDCA2, H2AFX | 5.15E-06    |
| GO:0051301~cell division                                                    | 13       | PRC1, CDC23, NUSAP1, ANLN, CDC20, C79407, NCAPD2, CCNB1, SPAG5, PLK1, F630043A04RIK, CDCA2, TOP2A                                          | 5.87E-06    |
| GO:0001944~vasculature development                                          | 10       | EDNRA, TCF21, HIF1A, HEY1, SOX18, COL1A1, FIGF, ENG, MMP2, COL5A1                                                                          | 3.27E-04    |
| GO:0001568~blood vessel development                                         | 9        | EDNRA, HIF1A, HEY1, SOX18, COL1A1, FIGF, ENG, MMP2, COL5A1                                                                                 | 0.001291533 |
| GO:0007018~microtubule-based movement                                       | 6        | KIF23, KIF22, KIF2C, KIF4, KIF18A, TUBE1                                                                                                   | 0.00185112  |
| GO:0007017~microtubule-based process                                        | 8        | KIF23, KIF22, KIF2C, KIF4, TPX2, KIF18A, TUBE1, NUSAP1                                                                                     | 0.002426587 |
| GO:0007169~transmembrane receptor protein tyrosine kinase signaling pathway | 7        | GRB10, IRS2, TIAM1, PDGFRB, FGF20, FIGF, CSF1R                                                                                             | 0.006565756 |
| GO:0033554~cellular response to stress                                      | 10       | KIF22, HIF1A, RAD23A, GSK3B, MAPK8IP2, H2AFX, KRT20, CHEK2, FEN1, RAD51                                                                    | 0.008592196 |
| GO:0048754~branching morphogenesis of a tube                                | 5        | EDNRA, TCF21, GPC3, ENG, PXN                                                                                                               | 0.008718856 |
| GO:0007167~enzyme-linked receptor protein signaling pathway                 | 8        | GRB10, IRS2, TIAM1, PDGFRB, FGF20, FIGF, ENG, CSF1R                                                                                        | 0.009731471 |
| GO:0030198~extracellular matrix organization                                | 5        | HSPG2, ADAMTS2, COL5A1, APLP1, EMILIN1                                                                                                     | 0.01156676  |
| GO:0010171~body morphogenesis                                               | 3        | GPC3, COL1A1, MMP2                                                                                                                         | 0.012828367 |
| GO:0030261~chromosome condensation                                          | 3        | NUSAP1, TOP2A, NCAPD2                                                                                                                      | 0.015421729 |
| GO:0035239~tube morphogenesis                                               | 6        | EDNRA, TCF21, GPC3, HIF1A, ENG, PXN                                                                                                        | 0.016664171 |
| GO:002963~collagen metabolic process                                        | 3        | HIF1A, ADAMTS2, MMP2                                                                                                                       | 0.01679561  |
| GO:0060346~bone trabecula formation                                         | 2        | COL1A1, MMP2                                                                                                                               | 0.017293486 |
| GO:0007059~chromosome segregation                                           | 4        | F630043A04RIK, KIF18A, NUSAP1, TOP2A                                                                                                       | 0.018118481 |
| GO:0044259~multicellular organismal macromolecule metabolic process         | 3        | HIF1A, ADAMTS2, MMP2                                                                                                                       | 0.018219658 |
| GO:0030814~regulation of cAMP metabolic process                             | 4        | EDNRA, ADCY6, TIMP2, ADORA1                                                                                                                | 0.020447695 |
| GO:0044236~multicellular organismal metabolic process                       | 3        | HIF1A, ADAMTS2, MMP2                                                                                                                       | 0.021214429 |
| GO:0000910~cytokinesis                                                      | 3        | PRC1, NUSAP1, ANLN                                                                                                                         | 0.02278327  |

Table S1. Cont.

| GO term                                                      | Gene no. | Genes                                                                                                        | P value     |
|--------------------------------------------------------------|----------|--------------------------------------------------------------------------------------------------------------|-------------|
| GO:0010648~negative regulation of cell communication         | 6        | DKK3, GBR10, GPC3, PAWR, RGS16, ADORA1                                                                       | 0.023038383 |
| GO:0001763~morphogenesis of a branching structure            | 5        | EDNRA, TCF21, GPC3, ENG, PXN                                                                                 | 0.023458806 |
| GO:0030799~regulation of cyclic nucleotide metabolic process | 4        | EDNRA, ADCY6, TIMP2, ADORA1                                                                                  | 0.025577753 |
| GO:0007242~intracellular signaling cascade                   | 15       | USP8, BAIAP2, ADCY6, IQGAP3, CHEK2, ADORA1, STK3, PXN, RLN1, TIAM1, GSK3B, MAPK8IP2, H2AFX, DEPDC1B, GADD45B | 0.027155727 |
| GO:0006140~regulation of nucleotide metabolic process        | 4        | EDNRA, ADCY6, TIMP2, ADORA1                                                                                  | 0.02742748  |
| GO:0035295~tube development                                  | 7        | EDNRA, TCF21, GPC3, HIF1A, ADAMTS2, ENG, PXN                                                                 | 0.027562353 |
| GO:0043588~skin development                                  | 3        | COL1A1, ADAMTS2, COL5A1                                                                                      | 0.027764592 |
| GO:0001525~angiogenesis                                      | 5        | EDNRA, HIF1A, SOX18, FIGF, ENG                                                                               | 0.028620776 |
| GO:0048514~blood vessel morphogenesis                        | 6        | EDNRA, HIF1A, HEY1, SOX18, FIGF, ENG                                                                         | 0.029144189 |
| GO:0043062~extracellular structure organization              | 5        | HSPG2, ADAMTS2, COL5A1, APLP1, EMILIN1                                                                       | 0.040830616 |
| GO:0001957~intramembranous ossification                      | 2        | COL1A1, MMP2                                                                                                 | 0.042679218 |
| GO:0007507~heart development                                 | 6        | EDNRA, HIF1A, ALPK3, HSPG2, ENG, COL5A1                                                                      | 0.044917917 |
| GO:0008285~negative regulation of cell proliferation         | 6        | GPC3, PPARG, PAWR, TIMP2, ADORA1, H19                                                                        | 0.045637208 |

GO, gene ontology.
